# Supplementary material for: PROtein Analytics for Kinase Therapeutic Inhibitor Variants (PROAKTIV): A Machine learning approach to predict efficacy of tyrosine kinase inhibitors against mutations in EGFR, ALK and BRAF
Source: Research Square preprint supplement (doi:10.21203/rs.3.rs-8730878/v1), 2026-02-06
Supplement: Supplementary file 1 [file 9030ffca98db24eef450a79c.docx]

**Supplementary Material**

**PROtein Analytics for Kinase Therapeutic Inhibitor Variants (PROAKTIV): A Machine learning approach to predict efficacy of tyrosine kinase inhibitors against mutations in EGFR, ALK and BRAF**

**Authors:** Harold Mateo Mojica Urrego2*, Matthew Groves¹, Anthonie Van der Wekken3, Juvenal Yosa Reyes¹

Affiliations:
¹Previous affiliation: University of Groningen, Groningen, The Netherlands. Current Affiliation:

2University of Navarra, San Sebastián, Spain.

3University Medical Center Groningen, Groningen, The Netherlands.

**Supplementary Note S1: Deep Learning Architectures**

1. **Overview**

To predict the binding affinity (pIC50) of TKI-kinase pairs within the PROAKTIV framework, we systematically developed and evaluated 12 distinct deep learning architectures. These models were constructed as a comparative matrix combining four ligand representation strategies with three protein encoding architectures. This factorial design allowed us to isolate the specific contributions of sequence-based and graph-based features to predictive performance.

**2. Ligand Representation Strategies**

We employed four distinct methods to encode the chemical structures of the tyrosine kinase inhibitors (TKIs), categorized into fixed molecular fingerprints and learnable neural representations:

- Morgan Fingerprints: A fixed-length bit-vector representation capturing circular substructures around each atom. Baseline models utilized 1024-bit fingerprints (radius 2), while the advanced ESM-2 architecture was paired with 2048-bit fingerprints to capture richer chemical context.
- Daylight Fingerprints: A path-based fingerprinting method that hashes molecular paths of specific lengths into a binary vector, offering an alternative fixed representation of topological connectivity.
- Message Passing Neural Networks (MPNNs): A graph-based deep learning approach where the molecule is treated as a graph (atoms as nodes, bonds as edges). The model learns feature vectors by iteratively passing messages between neighboring atoms, capturing complex topological and spatial dependencies.
- CNN on SMILES: A sequence-based approach where the Simplified Molecular Input Line Entry System (SMILES) string of the ligand is treated as a text sequence. A 1D Convolutional Neural Network (CNN) processes this sequence to extract local chemical motifs directly from the string representation.

3. **Protein Encoding Architectures**

Protein sequences (EGFR, ALK, BRAF variants) were processed using three distinct architectures, ranging from standard deep learning baselines to large-scale language models:

- Standard CNN: This architecture utilizes stacked 1D convolutional layers to scan the amino acid sequence. It extracts local patterns and motifs (such as binding pockets or structural domains) but is limited in capturing long-range dependencies across the entire sequence length.
- Hybrid CNN-RNN: To address the limitations of standard CNNs, this architecture combines convolutional layers with Bidirectional Long Short-Term Memory (BiLSTM) networks. The CNN layers act as feature extractors, while the RNN layers process these features sequentially, enabling the model to learn both local structural motifs and global sequence dependencies.
- Transformer (Fine-Tuned ESM-2): We substituted standard Transformer encoders with the ESM-2 (Evolutionary Scale Modeling) protein language model, specifically the 3-billion parameter variant ( esm2_t36_3B_UR50D ). By employing a Last-Layer Fine-Tuning strategy, we leveraged embeddings derived from the evolutionary history of millions of protein sequences. This allows the model to capture complex, non-linear interactions and context-aware features that are essential for characterizing rare or complex mutations.

4. **Hyperparameters and Training**

- Optimization:
  - Baseline Models: Trained using the Adam optimizer with a learning rate of 1 × 10−3 and a batch size of 128 for 30 epochs.
  - ESM-2 Model: Trained using the AdamW optimizer with hyperparameters (including learning rate and batch size) tuned via Optuna optimization. Training extended up to 300 epochs with early stopping (patience of 30 epochs) to ensure convergence.
- Data Splitting: The dataset was randomly partitioned into training (70%), testing (20%), and validation (10%) sets.
- Regularization & Uncertainty: To prevent overfitting and quantify prediction confidence, Monte Carlo (MC) Dropout was applied during both training and inference phases. This technique provides a probabilistic measure of uncertainty for each pIC50 prediction.

**5. Code Availability**

For complete transparency and reproducibility, the entire codebase for the **PROAKTIV** framework, including the data curation pipeline, model architectures, and training scripts, is publicly available. Researchers interested in replicating these experiments or adapting the models for other kinase targets can access the repository on GitHub at <https://github.com/HaroldMate1/proaktiv>.
